# Supplementary material for: TMT-Opsins differentially modulate medaka brain function in a context-dependent manner
Source: PLoS Biol. 2021 Jan 7;19(1):e3001012. doi: 10.1371/journal.pbio.3001012 (PMC7837489; doi:10.1371/journal.pbio.3001012)
Supplement: S6 Data — (XLSX) [file pbio.3001012.s006.xlsx]

## Sheet: panel 7C
sst1b relative mRNA levels DD1		WT								MUT
CT0		4.67	4.18	1.93	2					1.87	2.11	1.89	1.01
CT4		6.29	8.16	5.94	4.25	1.86	1.94	1.29	1.86		5.06	1.69	2.7	1.14	1.76	7.71	0.69
CT8		5.58	7.53	9.86	2.06	1.14	4.07	1.97		3.69	1.46	4.35	4.63	1.37	1.14	2.07	1.3
CT12		3.41	4.09	2.69	1.87	3.71	1.34	1.54	1.44	1.59	1.95	3.79	1.14	0.93	0.88	0.97
CT16		3.98	1.58	2.76	1.47	1.16	1.6	1.02	1.78	2.35	1.41	1.4	2.55	0.85	0.48	1.49	0.01
CT20		3.53	2.68	5.35	2.51	2.44	1.32	1.73	1.09	3	3.38	3.24	2.72	1.48	1.09	1.15	1.45
CT0		7.96	11.63	7.09	6.16	1.11	4.2	4.12	1.4	10.82	1.97	4.89	2.59	1.44	1.08	1.15	0.97

## Sheet: panel 7D
LD - Eyes	SD - Eyes	LD - Forebrain	SD - Forebrain	LD - Midbrain	SD - Midbrain	LD - Hindbrain	SD - Hindbrain
1.93	1.88	5.55	8.18	10.27	9.42	3.74	3.93
1.75	1.31	7.97	9.01	14.13	8	8.32	7.74
2.69	1.72	9.04	10.59	16.98	13.06	10.77	6.16
2.47	1.53	9.53	9.22	20.94	9.8	7.6	6.08
2.29	1.49	10.15	10.43	14.35	13.76	8.85	5.89
1.88	1.53	10.58	11.62	13.2	13.61	6.59	5.49
1.45	1.52	12.63	8.72	10.8	10.76	9.1	8.26
2.57	1.19	11.6	13.6	9.48	6.62	7.71	9.06
1.68	0.93	7.92	9.36	14.52	7.54	7.14	6.26
2.61	0.92	8.85	10.13	11.12	12.06	8.99	7.64
2.77	1.03	10.74	7.84	11.69	10.06	7.01	6.19
	0.58	11.05	8.98	9.88	10.91	4.36	5.38

## Sheet: panel 7E
LD - Eyes	SD - Eyes	LD - Forebrain	SD - Forebrain	LD - Midbrain	SD - Midbrain	LD - Hindbrain	SD - Hindbrain
1.33	1.48	8.36	10.49	7.9	7.28	4.9	3.84
2.18	1.11	14.55	8.82	11.46	8.57	5.78	5.82
2.8	1.26	9.53	7.86	12.49	9.52	5.56	5.61
3.53	0.99	12.59	5.98	10.25	9.72	6.38	5.11
1.76	0.87	13.06	5.74	14.98	6.8	8.8	6.05
2.45	1.02	12.84	6.71	12.09	9.27	8.06	4.68
2.39	1.08	11.67	7.18	9.64	9.18	7.01	7
2.45	0.91	9.98	6.63	9.24	6.98	4.86	4.98
4.54	1.26	9.61	9.36	9.79	4.76	4.33	5.22
2.74	1.2	10.73	6.78	7.07	5.84	6.04	5.38
2.59	1.17	10.81	6.82	10.85	6.61	7.34	6.73
2.06	1.64	10.1	5.67	10.31	9.04	8.53	5.55
